# Supplementary material for: Genetic Deletion or Pharmacological Inhibition of Dipeptidyl Peptidase-4 Improves Cardiovascular Outcomes After Myocardial Infarction in Mice
Source: PubMed Central journal article supplement — Diabetes. 2010 Jan 22;59(4):1063–73. doi: 10.2337/db09-0955 (PMC2844815; doi:10.2337/db09-0955), 2010-01-22
Supplement: supp_db09-0955_DB09-0955_online_appendix.pdf [file supp_db09-0955_DB09-0955_online_appendix.pdf]

# Supplementary Figure 1

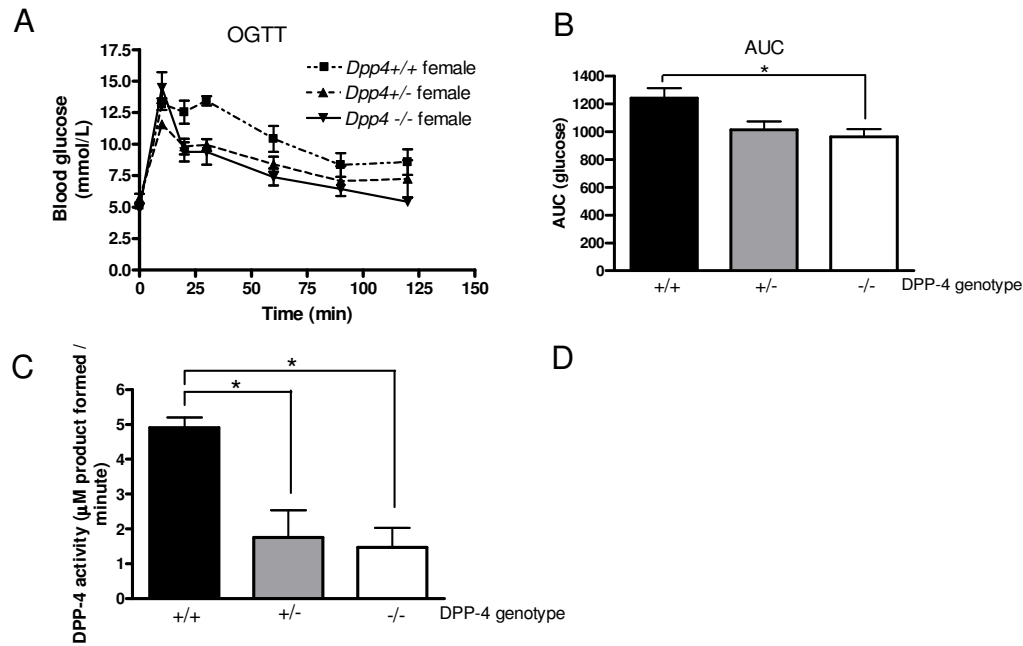

**Supplementary Figure 1. Genetic disruption of the *Dpp4* gene is associated with decreased plasma DPP-4 activity and significantly improved oral glucose tolerance.** Oral glucose tolerance (A&B), was significantly improved in *Dpp4*<sup>-/-</sup> mice compared with (A&B). Plasma DPP-4 activity is significantly lower in both *Dpp4*<sup>+/-</sup> and *Dpp4*<sup>-/-</sup> mice compared to *Dpp4*<sup>+/+</sup> mice (C). \*p<0.05 vs *Dpp4*<sup>+/+</sup>, n=5 for each genotype for A-C.
